# Supplementary material for: New insights into the sensing mechanism of shape controlled ZnO particles
Source: Royal Society of Chemistry journal article supplement (doi:10.1039/c6ra09824j), 2016-01-01
Supplement: c6ra09824j1.pdf [file c6ra09824j1.pdf]

**Supporting informations:**

# New Insights into the Sensing Mechanism of Shape Controlled ZnO Particles.

*Massimiliano D'Arienzo<sup>a\*</sup>, Matteo Redaelli<sup>a</sup>, Barbara Di Credico<sup>a</sup>, Stefano Polizzi<sup>b</sup>, Roberto Scotti<sup>a</sup>  
and Franca Morazzoni<sup>a</sup>*

<sup>a</sup>INSTM, Department of Materials Science, University of Milano-Bicocca,  
Via R. Cozzi 53, I-20125 Milano, Italy

<sup>b</sup>Department of Molecular Sciences and Nanosystems, University Ca' Foscari of Venezia,  
Via Torino 155/b, I-30172 Venezia, Italy

**RECEIVED DATE (to be automatically inserted after your manuscript is accepted if  
required according to the journal that you are submitting your paper to)**

\*e-mail: [massimiliano.darienzo1@unimib.it](mailto:massimiliano.darienzo1@unimib.it)

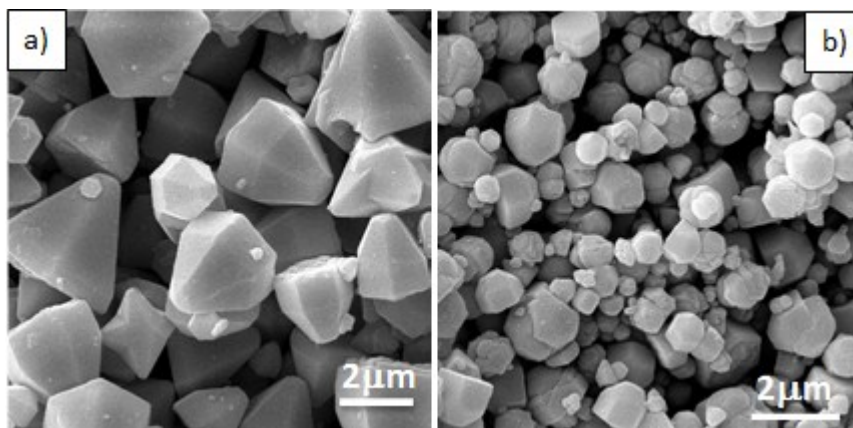

**Figure S1.** SEM images of ZnO microcrystals obtained at 200°C for a) Zn/OA/OM = 1:2:8 and b) Zn/OA/OM = 1:8:2

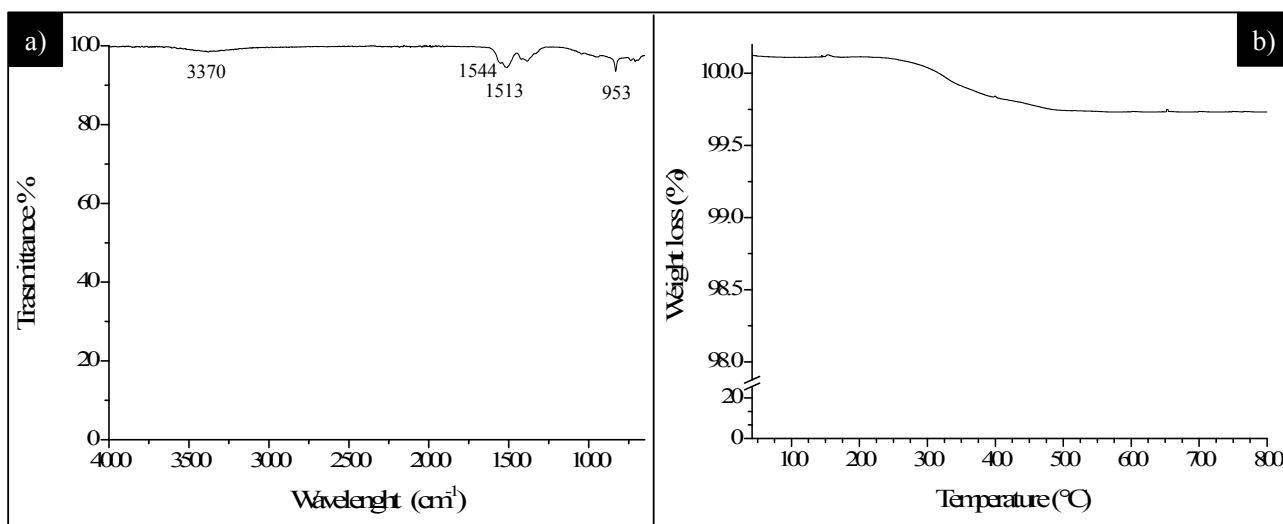

**Figure S2.** a) ATR-FTIR spectrum and b) TGA curve of *EP* microcrystals after the washing treatment with EtOH, in order to purify the products from the surfactants residuals.

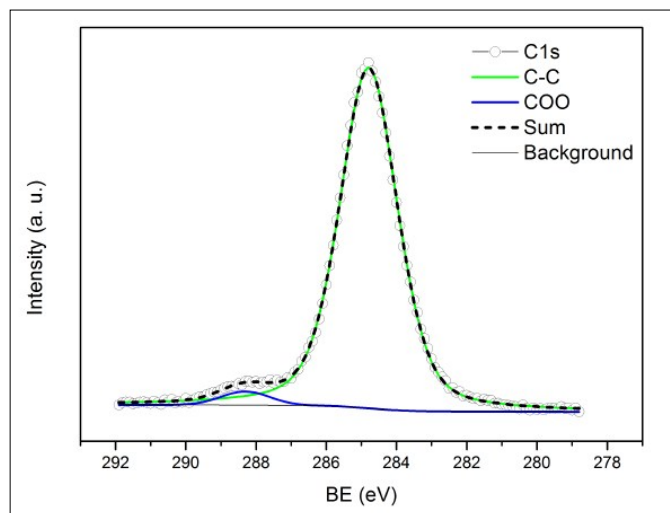

**Figure S3.** XPS spectrum in the C1s region for *EP* ZnO microcrystals

#### *ESR investigation*

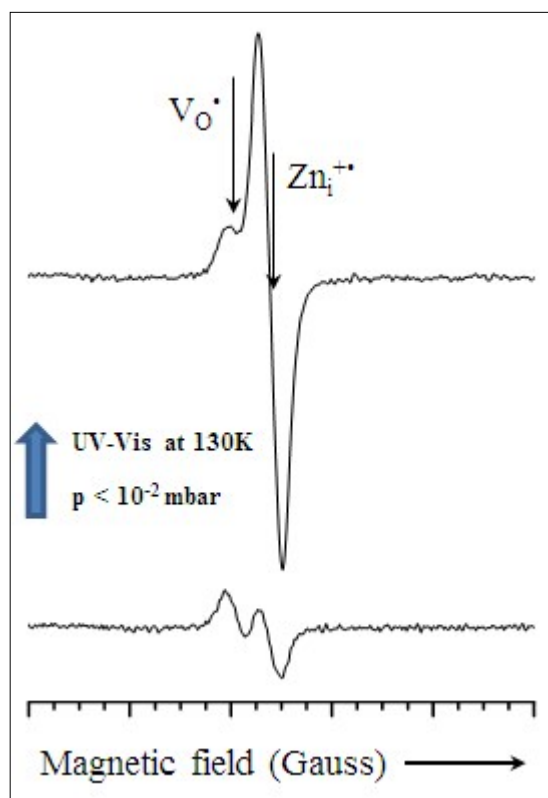

**Figure S4.** Experimental ESR spectra of ZnO® microcrystals at 130K before (bottom) and after (top) UV-Vis irradiation at  $p < 10^{-2}$  mbar.
